# Supplementary material
Source: PubMed Central journal article supplement (PMC5860154)
Supplement: kwx156talaeiwebmaterialfinal.pdf [file kwx156talaeiwebmaterialfinal.pdf]

## **Web Material**

### **Meat, dietary heme iron and risk of type 2 diabetes: The Singapore Chinese Health Study**

Mohammad Talaei, Ye-Li Wang, Jian-Min Yuan, An Pan, Woon-Puay Koh

#### **Web Appendix 1: FFQ items regarding different meat types**

Participants were asked about their red meat intake through eight items comprising of “minced pork (or beef) patty and ball”, “pork spareribs including bak kut teh”, “pork satay”, “other lean and fat pork slices, chops or cubes”, “lean pork slices including char siew”, “belly pork including siew yoke, pig trotters and pig skin”, “pork liver”, “mutton curry or mutton rendang”, and “other pig organs such as intestines”. Seven poultry items were listed as “deep fried chicken”, “pan or stir fried chicken”, “soy sauce chicken”, “chicken satay”, “boiled, stewed or roasted chicken”, “chicken curry or chicken rendang”, and “roasted or stewed duck or goose”. The intakes of fresh fish and shellfish were asked through 6 items, “fish ball or cake”, “deep fried fish”, “pan or stir fried fish”, “boiled or steamed fish”, “shrimp or prawn”, and “squid or cuttlefish”. Intake of preserved or processed meat foods were also asked in 12 items comprising “Chinese sausage”, “ham”, “hot dog (pork or chicken)”, “luncheon meat”, “meat floss”, “sweet barbeque meat”, “salted fish”, “anchovy”, “dried fish”, “other dried seafood”, “canned tuna”, and “canned sardine”.

**Web Figure 1: Participant flow**

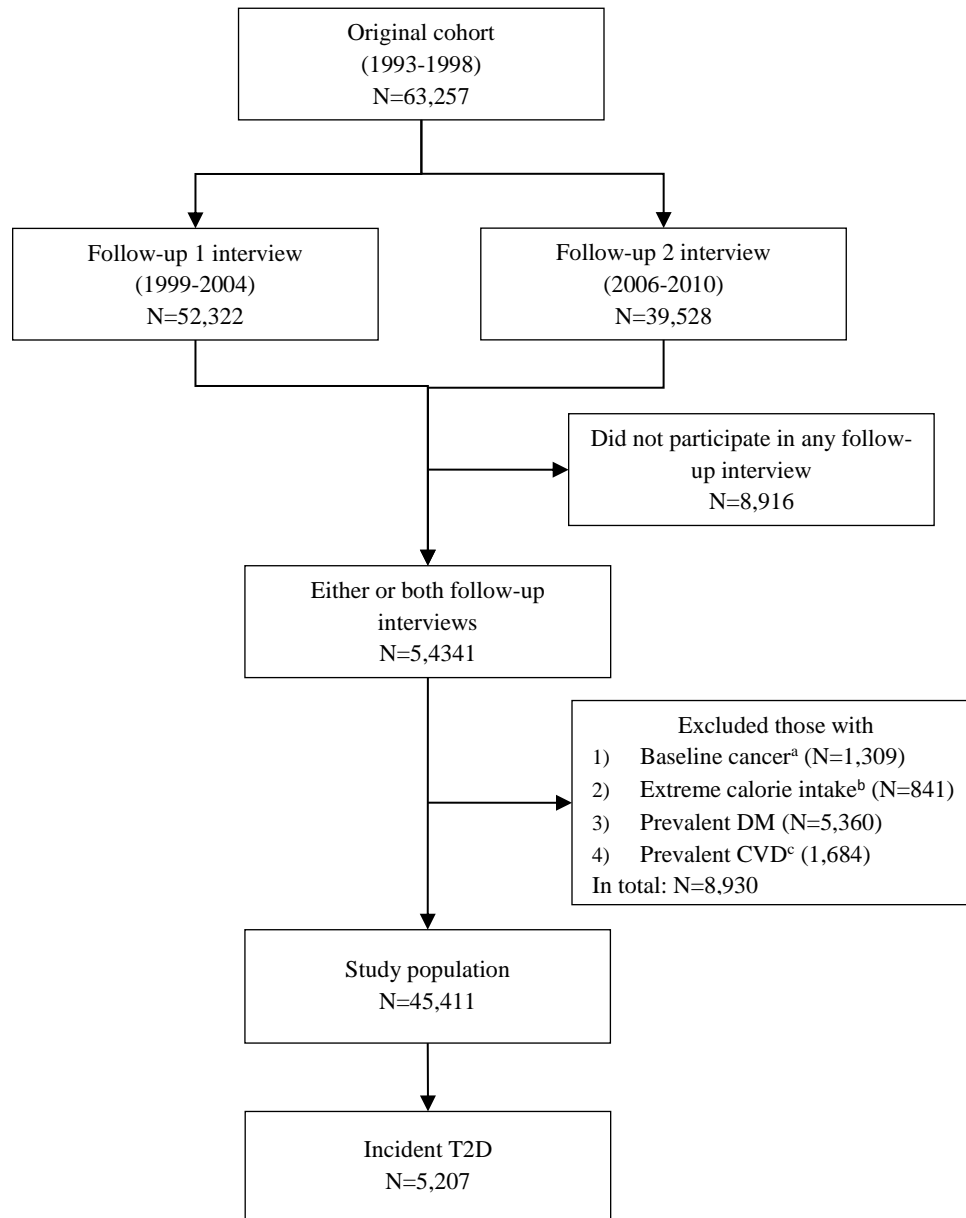

<sup>a</sup> Cancer history was identified either through self-report or via linkage with the nationwide Singapore Cancer Registry at baseline;

<sup>b</sup> <600 or >3000 kcal/d for women and <700 or >3700 kcal/d for men (>3 SDs higher or lower than the mean);

<sup>c</sup> Based on self-reported history of coronary heart disease or stroke at recruitment.

**Web Table 1:** Hazard Ratio (95% confidence interval) of Incident Type 2 Diabetes according to Intakes of Different Meat Types, the Singapore Chinese Health Study, 1993-2010

|                       | Quartiles of meat intake |                   |                   |                   | <i>P</i> for trend <sup>a</sup> |
|-----------------------|--------------------------|-------------------|-------------------|-------------------|---------------------------------|
|                       | Q1                       | Q2                | Q3                | Q4                |                                 |
| <b>Red meat</b>       |                          |                   |                   |                   |                                 |
| Median intake, g/d    | 12.3                     | 24.2              | 33.4              | 48.8              |                                 |
| Cases/person-years    | 1,240/127,885            | 1,290/123,383     | 1,215/121,781     | 1,462/121,692     |                                 |
| Model 1 <sup>b</sup>  | 1.00                     | 1.07 (0.99, 1.16) | 1.02 (0.94, 1.11) | 1.24 (1.15, 1.34) | <0.001                          |
| Model 2 <sup>c</sup>  | 1.00                     | 1.07 (0.99, 1.16) | 1.02 (0.94, 1.11) | 1.23 (1.14, 1.33) | <0.001                          |
| Model 3 <sup>d</sup>  | 1.00                     | 1.02 (0.93, 1.12) | 0.96 (0.87, 1.06) | 1.13 (1.01, 1.25) | 0.02                            |
| <b>Poultry</b>        |                          |                   |                   |                   |                                 |
| Median intake, g/d    | 5.8                      | 14.7              | 21.9              | 35.9              |                                 |
| Cases/person-years    | 1,224/123,045            | 1,292/121,730     | 1,283/122,589     | 1,408/127,377     |                                 |
| Model 1 <sup>b</sup>  | 1.00                     | 1.06 (0.98, 1.15) | 1.06 (0.98, 1.15) | 1.14 (1.06, 1.23) | 0.001                           |
| Model 2 <sup>c</sup>  | 1.00                     | 1.09 (1.00, 1.18) | 1.08 (1.00, 1.18) | 1.15 (1.06, 1.24) | 0.001                           |
| Model 3 <sup>d</sup>  | 1.00                     | 1.04 (0.95, 1.13) | 1.00 (0.91, 1.10) | 1.01 (0.91, 1.12) | 0.97                            |
| <b>Fish/shellfish</b> |                          |                   |                   |                   |                                 |
| Median intake, g/d    | 27.9                     | 45.3              | 60.2              | 82.7              |                                 |
| Cases/person-years    | 1,239/122,515            | 1,267/122,309     | 1,284/125,094     | 1,417/124,823     |                                 |
| Model 1 <sup>b</sup>  | 1.00                     | 1.02 (0.94, 1.10) | 1.01 (0.93, 1.09) | 1.12 (1.04, 1.21) | 0.003                           |
| Model 2 <sup>c</sup>  | 1.00                     | 1.00 (0.93, 1.09) | 0.96 (0.89, 1.04) | 1.07 (0.99, 1.16) | 0.12                            |
| Model 3 <sup>d</sup>  | 1.00                     | 0.97 (0.90, 1.05) | 0.92 (0.85, 1.00) | 1.00 (0.92, 1.09) | 0.98                            |

<sup>a</sup> Linear trend was tested by treating the median intake values of quartiles as a continuous variable using cox proportional hazards models;

<sup>b</sup> Multivariate model 1: adjusted for age, sex, dialect, year of interview, and educational level;

<sup>c</sup> Multivariate model 2: further adjusted for body mass index, physical activity, smoking status, alcohol use, baseline history of self-reported hypertension, vegetables–fruit–soy dietary pattern, and total energy intake;

<sup>d</sup> Multivariate model 3: further adjusted for heme iron intake.

**Web Table 2:** Hazard ratio (95% confidence interval) of incident type 2 diabetes according to intakes of fresh or preserved meat

|                                 | Quartiles of meat intake |                   |                   |                   | P for trend <sup>a</sup> |
|---------------------------------|--------------------------|-------------------|-------------------|-------------------|--------------------------|
|                                 | Q1                       | Q2                | Q3                | Q4                |                          |
| <b>Fresh red meat</b>           |                          |                   |                   |                   |                          |
| Median intake, g/d              | 10.5                     | 20.7              | 29.0              | 43.5              |                          |
| Cases/person-years              | 1,239/127,522            | 1,302/122,599     | 1,208/122,636     | 1,458/121,984     |                          |
| Model 1 <sup>b</sup>            | 1.00                     | 1.09 (1.01, 1.18) | 1.00 (0.93, 1.09) | 1.22 (1.14, 1.32) | <0.001                   |
| Model 2 <sup>c</sup>            | 1.00                     | 1.09 (1.01, 1.19) | 1.01 (0.93, 1.10) | 1.22 (1.13, 1.31) | <0.001                   |
| Model 3 <sup>d</sup>            | 1.00                     | 1.04 (0.95, 1.14) | 0.94 (0.85, 1.03) | 1.11 (1.00, 1.23) | 0.04                     |
| <b>Red organ meat</b>           |                          |                   |                   |                   |                          |
| Median intake, g/d              | 0                        | 0.5               | 0.96              | 2.40              |                          |
| Cases/person-years              | 1302/129172              | 1322/125207       | 1298/120324       | 1285/120038       |                          |
| Model 1 <sup>b</sup>            | 1.00                     | 1.04 (0.96, 1.12) | 1.05 (0.97, 1.14) | 1.06 (0.98, 1.14) | 0.15                     |
| Model 2 <sup>c</sup>            | 1.00                     | 1.09 (1.00, 1.19) | 1.11 (1.01, 1.22) | 1.11 (1.02, 1.21) | 0.02                     |
| Model 3 <sup>d</sup>            | 1.00                     | 1.06 (0.97, 1.15) | 1.04 (0.94, 1.14) | 1.02 (0.93, 1.12) | 0.90                     |
| <b>Preserved red meat</b>       |                          |                   |                   |                   |                          |
| Median intake, g/d              | 0                        | 1.4               | 2.57              | 5.39              |                          |
| Cases/person-years              | 1,318/128,168            | 1,286/125,362     | 1,290/121,244     | 1,313/119,967     |                          |
| Model 1 <sup>b</sup>            | 1.00                     | 0.99 (0.92, 1.07) | 1.02 (0.94, 1.10) | 1.07 (0.99, 1.16) | 0.05                     |
| Model 2 <sup>c</sup>            | 1.00                     | 0.99 (0.91, 1.08) | 1.03 (0.94, 1.12) | 1.09 (1.00, 1.18) | 0.02                     |
| Model 3 <sup>d</sup>            | 1.00                     | 0.98 (0.90, 1.07) | 1.00 (0.92, 1.10) | 1.05 (0.97, 1.15) | 0.15                     |
| <b>Fresh fish/shellfish</b>     |                          |                   |                   |                   |                          |
| Median intake, g/d              | 25.4                     | 42.3              | 57.2              | 79.4              |                          |
| Cases/person-years              | 1,235/122,467            | 1,272/121,981     | 1,271/125,347     | 1,429/124,946     |                          |
| Model 1 <sup>b</sup>            | 1.00                     | 1.03 (0.95, 1.11) | 1.00 (0.93, 1.08) | 1.14 (1.05, 1.23) | 0.002                    |
| Model 2 <sup>c</sup>            | 1.00                     | 1.02 (0.94, 1.10) | 0.95 (0.88, 1.03) | 1.09 (1.01, 1.17) | 0.07                     |
| Model 3 <sup>d</sup>            | 1.00                     | 0.99 (0.91, 1.07) | 0.91 (0.84, 0.99) | 1.02 (0.93, 1.10) | 0.89                     |
| <b>Preserved fish/shellfish</b> |                          |                   |                   |                   |                          |
| Median intake, g/d              | 0.23                     | 1.70              | 2.96              | 5.78              |                          |
| Cases/person-years              | 1,304/125,801            | 1,254/123,735     | 1,314/121,103     | 1,335/124,102     |                          |
| Model 1 <sup>b</sup>            | 1.00                     | 0.97 (0.89, 1.14) | 1.03 (0.95, 1.11) | 1.03 (0.95, 1.11) | 0.22                     |
| Model 2 <sup>c</sup>            | 1.00                     | 1.00 (0.92, 1.08) | 1.07 (0.98, 1.16) | 1.06 (0.98, 1.14) | 0.07                     |
| Model 3 <sup>d</sup>            | 1.00                     | 0.98 (0.90, 1.06) | 1.04 (0.95, 1.13) | 1.03 (0.95, 1.12) | 0.28                     |

- <sup>a</sup> Linear trend was tested by treating the median intake values of quartiles as a continuous variable;
- <sup>b</sup> Multivariate model 1: adjusted for age, sex, dialect, year of interview, and educational level;
- <sup>c</sup> Multivariate model 2: further adjusted for body mass index, physical activity, smoking status, alcohol use, baseline history of self-reported hypertension, meat–dumpling dietary pattern, vegetables–fruit–soy dietary pattern, and total energy intake;
- <sup>d</sup> Multivariate model 3: further adjusted for heme iron intake.

**Web Table 3:** Hazard Ratio (95% confidence interval) of Incident Type 2 Diabetes according to Intakes of Heme Iron, the Singapore Chinese Health Study, 1993-2010

|                                         | Quartiles of iron intake |                   |                   |                   | <i>P</i> for trend <sup>a</sup> |
|-----------------------------------------|--------------------------|-------------------|-------------------|-------------------|---------------------------------|
|                                         | Q1                       | Q2                | Q3                | Q4                |                                 |
| <b>Heme Iron</b>                        |                          |                   |                   |                   |                                 |
| Median intake, mg/d                     | 0.21                     | 0.37              | 0.47              | 0.64              |                                 |
| Cases/person-years                      | 1,181/124,549            | 1,297/ 122,350    | 1,283/123,337     | 1,446/124,505     |                                 |
| Model 1 <sup>b</sup>                    | 1.00                     | 1.11 (1.03, 1.21) | 1.10 (1.01, 1.19) | 1.24 (1.15, 1.34) | <0.001                          |
| Model 2 <sup>c</sup>                    | 1.00                     | 1.11 (1.03, 1.21) | 1.10 (1.02, 1.20) | 1.24 (1.14, 1.34) | <0.001                          |
| Model 3 <sup>d</sup>                    | 1.00                     | 1.11 (1.02, 1.21) | 1.10 (1.01, 1.20) | 1.23 (1.13, 1.34) | <0.001                          |
| Model 3 <sup>d</sup> + poultry and fish | 1.00                     | 1.11 (1.01, 1.21) | 1.10 (0.99, 1.22) | 1.23 (1.09, 1.38) | 0.001                           |
| Model 3 <sup>d</sup> + red meat         | 1.00                     | 1.10 (1.00, 1.21) | 1.07 (0.96, 1.19) | 1.14 (1.02, 1.28) | 0.03                            |
| <b>Non-heme Iron</b>                    |                          |                   |                   |                   |                                 |
| Median intake, mg/d                     | 6.07                     | 7.25              | 8.10              | 9.38              |                                 |
| Cases/person-years                      | 1,347/127,128            | 1,314/ 124,655    | 1,251/122,778     | 1,295/120,180     |                                 |
| Model 1 <sup>b</sup>                    | 1.00                     | 0.99 (0.92, 1.07) | 0.97 (0.89, 1.05) | 1.04 (0.96, 1.12) | 0.45                            |
| Model 2 <sup>c</sup>                    | 1.00                     | 1.01 (0.93, 1.09) | 0.97 (0.89, 1.05) | 1.02 (0.94, 1.11) | 0.77                            |
| Model 3 <sup>d</sup>                    | 1.00                     | 0.98 (0.90, 1.07) | 0.92 (0.83, 1.01) | 0.94 (0.83, 1.06) | 0.26                            |
| Model 3 <sup>d</sup> + poultry and fish | 1.00                     | 0.98 (0.90, 1.07) | 0.93 (0.84, 1.02) | 0.96 (0.85, 1.08) | 0.44                            |
| Model 3 <sup>d</sup> + red meat         | 1.00                     | 0.97 (0.89, 1.06) | 0.93 (0.84, 1.02) | 0.97 (0.86, 1.09) | 0.56                            |

<sup>a</sup> Linear trend was tested by treating the median intake values of quartiles as a continuous variable using cox proportional hazards models;

<sup>b</sup> Multivariate model 1: adjusted for age, sex, dialect, year of interview, and educational level;

<sup>c</sup> Multivariate model 2: further adjusted for body mass index, physical activity, smoking status, alcohol use, baseline history of self-reported hypertension, vegetables–fruit–soy dietary pattern, and total energy intake;

<sup>d</sup> Multivariate model 3: except for dietary patterns, further adjusted for dietary intakes of egg, soy, non-soy legumes, vegetables, fruit, noodles, rice, nuts and seeds, coffee, and soda.

**Web Table 4:** Hazard ratio (95% confidence interval) of incident type 2 diabetes according to intakes of different meat types in men and women

|                       | Quartiles of meat intake |                   |                   |                   | P for trend <sup>a</sup> |
|-----------------------|--------------------------|-------------------|-------------------|-------------------|--------------------------|
|                       | Q1                       | Q2                | Q3                | Q4                |                          |
| <b>Men</b>            |                          |                   |                   |                   |                          |
| <b>Red meat</b>       |                          |                   |                   |                   |                          |
| Median intake, g/d    | 9.5                      | 23.3              | 34.1              | 52.5              |                          |
| Cases/person-years    | 519/53,120               | 544/52,200        | 532/52,238        | 600/51,690        |                          |
| Model 1 <sup>b</sup>  | 1.00                     | 1.07 (0.94, 1.21) | 1.07 (0.94, 1.21) | 1.18 (1.05, 1.33) | 0.006                    |
| Model 2 <sup>c</sup>  | 1.00                     | 1.07 (0.93, 1.23) | 1.11 (0.95, 1.29) | 1.24 (1.05, 1.47) | 0.008                    |
| <b>Poultry</b>        |                          |                   |                   |                   |                          |
| Median intake, g/d    | 3.2                      | 13.5              | 22.0              | 38.1              |                          |
| Cases/person-years    | 515/52702                | 565/51563         | 557/52478         | 558/52505         |                          |
| Model 1 <sup>b</sup>  | 1.00                     | 1.16 (1.02, 1.31) | 1.13 (1.00, 1.29) | 1.12 (0.99, 1.27) | 0.14                     |
| Model 2 <sup>c</sup>  | 1.00                     | 1.15 (1.01, 1.31) | 1.13 (0.98, 1.31) | 1.11 (0.94, 1.30) | 0.37                     |
| <b>Fish/shellfish</b> |                          |                   |                   |                   |                          |
| Median intake, g/d    | 23.9                     | 42.5              | 58.7              | 82.6              |                          |
| Cases/person-years    | 513/51,566               | 532/52,167        | 549/52,810        | 601/52,705        |                          |
| Model 1 <sup>b</sup>  | 1.00                     | 1.00 (0.88, 1.13) | 1.00 (0.88, 1.13) | 1.05 (0.93, 1.19) | 0.25                     |
| Model 2 <sup>c</sup>  | 1.00                     | 1.00 (0.89, 1.14) | 1.00 (0.88, 1.13) | 1.04 (0.91, 1.18) | 0.42                     |
| <b>Women</b>          |                          |                   |                   |                   |                          |
| <b>Red meat</b>       |                          |                   |                   |                   |                          |
| Median intake, g/d    | 13.8                     | 24.5              | 32.7              | 46.5              |                          |
| Cases/person-years    | 691/71,779               | 726/70,984        | 718/72,004        | 877/70,726        |                          |
| Model 1 <sup>b</sup>  | 1.00                     | 1.05 (0.95, 1.17) | 1.02 (0.91, 1.13) | 1.28 (1.16, 1.42) | <0.001                   |
| Model 2 <sup>c</sup>  | 1.00                     | 0.96 (0.85, 1.08) | 0.88 (0.77, 1.00) | 1.05 (0.91, 1.21) | 0.26                     |
| <b>Poultry</b>        |                          |                   |                   |                   |                          |
| Median intake, g/d    | 7.9                      | 15.6              | 22.2              | 35.1              |                          |
| Cases/person-years    | 703/71,989               | 753/71,299        | 741/71,475        | 815/70,730        |                          |
| Model 1 <sup>b</sup>  | 1.00                     | 1.08 (0.97, 1.20) | 1.09 (0.98, 1.21) | 1.22 (1.10, 1.35) | <0.001                   |
| Model 2 <sup>c</sup>  | 1.00                     | 1.00 (0.89, 1.12) | 0.96 (0.85, 1.09) | 1.00 (0.88, 1.15) | 0.96                     |
| <b>Fish/shellfish</b> |                          |                   |                   |                   |                          |
| Median intake, g/d    | 31.3                     | 47.1              | 61.2              | 82.8              |                          |

| Cases/person-years   | 728/70,809 | 730/70,813        | 746/71,945        | 808/71,926        |      |
|----------------------|------------|-------------------|-------------------|-------------------|------|
| Model 1 <sup>b</sup> | 1.00       | 0.97 (0.87, 1.07) | 0.95 (0.86, 1.06) | 1.05 (0.95, 1.17) | 0.29 |
| Model 2 <sup>c</sup> | 1.00       | 0.92 (0.83, 1.02) | 0.88 (0.80, 0.98) | 0.95 (0.85, 1.05) | 0.38 |

<sup>a</sup> Linear trend was tested by treating the median intake values of quartiles as a continuous variable;

<sup>b</sup> Multivariate model 1: adjusted for age, sex, dialect, year of interview, and educational level, body mass index, physical activity, smoking status, alcohol use, baseline history of self-reported hypertension, vegetables–fruit–soy dietary pattern, and total energy intake;

<sup>c</sup> Multivariate model 2: further adjusted for heme-iron intake.



**Web Table 5:** Hazard ratio (95% confidence interval) of incident type 2 diabetes according to intakes of heme iron in men and women

|                                         | Quartiles of iron intake |                   |                   |                   | P for trend <sup>a</sup> |
|-----------------------------------------|--------------------------|-------------------|-------------------|-------------------|--------------------------|
|                                         | Q1                       | Q2                | Q3                | Q4                |                          |
| <b>Men</b>                              |                          |                   |                   |                   |                          |
| <b>Heme Iron</b>                        |                          |                   |                   |                   |                          |
| Median intake, g/d                      | 0.18                     | 0.36              | 0.48              | 0.68              |                          |
| Cases/person-years                      | 514/52,936               | 573/50,930        | 526/52,157        | 582/53,225        |                          |
| Model 1 <sup>b</sup>                    | 1.00                     | 1.15 (1.02, 1.30) | 1.07 (0.93, 1.22) | 1.15 (1.00, 1.32) | 0.08                     |
| Model 1 <sup>b</sup> + Poultry and fish | 1.00                     | 1.11 (0.97, 1.27) | 1.02 (0.87, 1.19) | 1.11 (0.92, 1.33) | 0.31                     |
| Model 1 <sup>b</sup> + Red meat         | 1.00                     | 1.11 (0.97, 1.28) | 0.99 (0.84, 1.16) | 1.01 (0.85, 1.20) | 0.96                     |
| <b>Non-heme Iron</b>                    |                          |                   |                   |                   |                          |
| Median intake, g/d                      | 5.46                     | 6.85              | 7.78              | 9.13              |                          |
| Cases/person-years                      | 586/56,033               | 553/52,896        | 523/51,220        | 533/49,099        |                          |
| Model 1 <sup>b</sup>                    | 1.00                     | 1.01 (0.89, 1.15) | 0.97 (0.83, 1.13) | 0.98 (0.82, 1.17) | 0.77                     |
| Model 1 <sup>b</sup> + Poultry and fish | 1.00                     | 1.00 (0.88, 1.14) | 0.97 (0.83, 1.13) | 0.99 (0.82, 1.19) | 0.85                     |
| Model 1 <sup>b</sup> + Red meat         | 1.00                     | 1.00 (0.88, 1.14) | 0.97 (0.83, 1.13) | 0.99 (0.83, 1.19) | 0.91                     |
| <b>Women</b>                            |                          |                   |                   |                   |                          |
| <b>Heme Iron</b>                        |                          |                   |                   |                   |                          |
| Median intake, g/d                      | 0.24                     | 0.37              | 0.47              | 0.61              |                          |
| Cases/person-years                      | 659/72,409               | 737/70,680        | 749/70,736        | 867/71,668        |                          |
| Model 1 <sup>b</sup>                    | 1.00                     | 1.14 (1.02, 1.27) | 1.17 (1.04, 1.31) | 1.32 (1.18, 1.49) | <0.001                   |
| Model 1 <sup>b</sup> + Poultry and fish | 1.00                     | 1.17 (1.04, 1.32) | 1.22 (1.07, 1.40) | 1.37 (1.18, 1.60) | <0.001                   |
| Model 1 <sup>b</sup> + Red meat         | 1.00                     | 1.16 (1.03, 1.32) | 1.20 (1.04, 1.37) | 1.30 (1.12, 1.51) | 0.001                    |
| <b>Non-heme Iron</b>                    |                          |                   |                   |                   |                          |
| Median intake, g/d                      | 6.59                     | 7.53              | 8.29              | 9.51              |                          |
| Cases/person-years                      | 772/72,835               | 749/71,786        | 722/71,134        | 769/69,738        |                          |
| Model 1 <sup>b</sup>                    | 1.00                     | 0.99 (0.89, 1.10) | 0.95 (0.84, 1.08) | 1.03 (0.88, 1.19) | 0.75                     |
| Model 1 <sup>b</sup> + Poultry and fish | 1.00                     | 1.00 (0.89, 1.11) | 0.97 (0.85, 1.10) | 1.06 (0.91, 1.23) | 0.46                     |
| Model 1 <sup>b</sup> + Red meat         | 1.00                     | 1.00 (0.89, 1.12) | 0.98 (0.86, 1.11) | 1.08 (0.92, 1.25) | 0.35                     |

<sup>a</sup> Linear trend was tested by treating the median intake values of quartiles as a continuous variable;

<sup>b</sup> Multivariate model 1: adjusted for age, sex, dialect, year of interview, educational level, body mass index, physical activity, smoking status, alcohol use, baseline history of self-reported hypertension, total energy intake, dietary intakes of egg, soy, non-soy legumes, vegetables, fruit, noodles, rice, nuts and seeds, coffee, and soda.
